# Supplementary material for: Multi-locus models of genetic risk of disease
Source: Springer Nature journal article supplement (doi:10.1186/gm131), 2010-02-02
Supplement: Additional file 1 [file gm131-s1.pdf]

## Detailed description of simulations

### Deterministic simulation (direct numerical analysis)

For each model we evaluated the probability of disease ( $g_x$ ) as described in the main paper using direct numerical evaluation, calculating the probability ( $q_x$ ) of an individual having (or equally the proportion of the population with)  $x = 0, 1.. 2n$  risk loci, since  $x \sim B(2n, p)$ . In the Odds model  $\gamma = \tau(1-f_n)/(1-f_n)$ .

### Stochastic simulation

We use stochastic simulation to allow comparison models on the measures of risk rates in relatives and narrow sense heritability on the risk scale ( $h_{01}^2$ ). Input parameters are  $K, n, p$  and  $h_L^2$  or  $\tau$ , but based on the results from the deterministic simulation we consider only  $n = 1000$  and  $p = 0.3$ . For the Risch and Odds models we simulate the alleles at each locus for individuals over three generations for  $N = 10^6$  families. Alleles of founders are sampled as  $B(2, p)$ . Each child receives one allele sampled at random from each parent. For each individual the number of risk alleles  $x$  is calculated. The probability of disease for the Risch model is:  $g_x = f_n \tau^x$ , and Odds model:  $g_x = Kc_n \gamma^x / [1 + K(c_n \gamma^x - 1)]$  with  $f_n$  and  $c_n$  derived iteratively as in the deterministic simulation. For each individual, we sampled  $w \sim U(0,1)$  and if  $g > w$ , the individual was considered affected, otherwise not affected. The disease status of an MZ twin was calculated in the same way by drawing a second random number from the uniform distribution.

For the Probit model, the input parameters were  $K$  and  $h_L^2$  calculated as for the deterministic model and assumed a normal distribution of genetic effects on the underlying liability scale. The results from the deterministic simulations had shown that the results were independent of  $n$  and  $p$  and the variance contributed by each

locus, but were dependent only on the total variance contributed by all loci, parameterised through  $h_L^2$ . The genetic ( $u$ ) and phenotypic ( $y$ ) risk of disease on the liability scale was simulated as  $y = u + e$  where  $u \sim N(0, h_L^2)$  for founders and  $u = \frac{1}{2}u_{dad} + \frac{1}{2}u_{mum} + u_{mend}$  for children where the mendelian segregation term  $u_{mend} \sim N(0, \frac{1}{2}h_L^2)$ . The environmental effect  $e \sim N(0, 1 - h_L^2)$ . The underlying risk phenotype of an MZ twin was simulated by drawing a new  $e$  for an individual. Individuals were considered affected if  $y > \Phi^{-1}(1 - K) = t$ .

From these simulations we could calculate  $\lambda_{MZ}$ ,  $\lambda_{Sib}$ ,  $\lambda_{OP}$  and the recurrence risk of disease in grandchildren of affected grandparents,  $\lambda_{OG}$ . From these we calculate  $H_{01}^2$  (equation 1) and  $h_{01}^2 \approx 4(\lambda_{OG} - 1)K / (1 - K)$  which is an estimate of narrow sense heritability that is less contaminated by non-additive variance than the estimate  $2(\lambda_{OP} - 1)K / (1 - K)$ . We used the results from the deterministic simulation to check results from the stochastic simulation (the deterministic results are a subset of the stochastic results) and in the Results section we do not distinguish between them.
