# Supplementary material for: Multi-locus models of genetic risk of disease
Source: Springer Nature journal article supplement (doi:10.1186/gm131), 2010-02-02
Supplement: Additional file 2 [file gm131-s2.docx]

Broad sense heritabilities on the disease risk scale, (equation 2) for different combinations of disease prevalence, *K*, number of risk loci, *n*, risk allele frequency, *p*, heritability on the liability scale, and risk of a single risk allele compared to the non-risk allele, ** .

|  |  |  |  |  |  |  |  |
| --- | --- | --- | --- | --- | --- | --- | --- |
| *K* | *n* | *p* |  | ** | Probit | CRisch | Odds |
| 0.001 | 1000 | 0.1 | 0.7 | 1.93 | 0.15 | 0.76 | 0.62 |
| 0.001 | 1000 | 0.3 | 0.7 | 1.54 | 0.15 | 0.77 | 0.62 |
| 0.001 | 10000 | 0.1 | 0.7 | 1.23 | 0.15 | 0.77 | 0.62 |
| 0.001 | 10000 | 0.3 | 0.7 | 1.15 | 0.15 | 0.77 | 0.62 |
| 0.01 | 1000 | 0.1 | 0.7 | 1.65 | 0.26 | 0.76 | 0.61 |
| 0.01 | 1000 | 0.3 | 0.7 | 1.39 | 0.26 | 0.76 | 0.62 |
| 0.01 | 10000 | 0.1 | 0.7 | 1.17 | 0.26 | 0.77 | 0.62 |
| 0.01 | 10000 | 0.3 | 0.7 | 1.11 | 0.26 | 0.77 | 0.62 |
| 0.1 | 100 | 0.3 | 0.7 | 1.83 | 0.41 | 0.72 | 0.55 |
| 0.1 | 1000 | 0.1 | 0.7 | 1.35 | 0.41 | 0.73 | 0.56 |
| 0.1 | 1000 | 0.3 | 0.7 | 1.22 | 0.41 | 0.73 | 0.56 |
| 0.1 | 10000 | 0.1 | 0.7 | 1.10 | 0.41 | 0.73 | 0.56 |
| 0.1 | 10000 | 0.3 | 0.7 | 1.06 | 0.41 | 0.73 | 0.56 |
| 0.001 | 1000 | 0.1 | 0.5 | 1.40 | 0.05 | 0.49 | 0.32 |
| 0.001 | 10000 | 0.1 | 0.5 | 1.11 | 0.05 | 0.49 | 0.32 |
| 0.001 | 1000 | 0.3 | 0.5 | 1.25 | 0.05 | 0.49 | 0.31 |
| 0.001 | 10000 | 0.3 | 0.5 | 1.07 | 0.05 | 0.49 | 0.32 |
| 0.01 | 1000 | 0.1 | 0.5 | 1.30 | 0.12 | 0.51 | 0.34 |
| 0.01 | 10000 | 0.1 | 0.5 | 1.09 | 0.12 | 0.51 | 0.34 |
| 0.01 | 100 | 0.3 | 0.5 | 1.71 | 0.12 | 0.50 | 0.33 |
| 0.01 | 1000 | 0.3 | 0.5 | 1.19 | 0.12 | 0.51 | 0.34 |
| 0.01 | 10000 | 0.3 | 0.5 | 1.06 | 0.12 | 0.51 | 0.34 |
| 0.1 | 100 | 0.1 | 0.5 | 1.64 | 0.25 | 0.50 | 0.31 |
| 0.1 | 1000 | 0.1 | 0.5 | 1.18 | 0.25 | 0.51 | 0.32 |
| 0.1 | 10000 | 0.1 | 0.5 | 1.05 | 0.25 | 0.51 | 0.32 |
| 0.1 | 100 | 0.3 | 0.5 | 1.39 | 0.25 | 0.50 | 0.31 |
| 0.1 | 1000 | 0.3 | 0.5 | 1.11 | 0.25 | 0.51 | 0.32 |
| 0.1 | 10000 | 0.3 | 0.5 | 1.03 | 0.25 | 0.51 | 0.32 |

Input parameters for all models are *K, n* and *p*. is an input parameter for the Probit model only.** is an input parameter for the CRisch and Odds model simulations and is calculated as**at the average number of risk loci in the Probit model simulations.
